# Supplementary material for: HNF4α is a therapeutic target that links AMPK to WNT signalling in early-stage gastric cancer
Source: PubMed Central journal article supplement — Gut. 2014 Nov 19;65(1):19–32. doi: 10.1136/gutjnl-2014-307918 (PMC4717359; doi:10.1136/gutjnl-2014-307918), 2014-11-19
Supplement: gutjnl-2014-307918-s1.pdf [file gutjnl-2014-307918-s1.pdf]

**Table S1.** Clinical and histopathological characteristics of gastric cancer samples from Caucasian patient dataset

|    | Code (Paired Normal Tissue) | Code (Gastric Cancer) | Sex | age | Date of Dx | Location    | Histology          | Pattern                            | Precursor           | Depth | LV Invasion | Metastasis | stage |
|----|-----------------------------|-----------------------|-----|-----|------------|-------------|--------------------|------------------------------------|---------------------|-------|-------------|------------|-------|
| 1  | GN1                         | GT1                   | M   | 65  | 2001       | Distal      | poorly             | variegated                         | NA                  | T3    | yes         | 2,7        | IIB   |
| 2  | GN2                         | GT2                   | F   | 63  | 2004       | Distal      | moderate           | intestinal                         | adenoma, metaplasia | T2    | no          | 0,15       | IB    |
| 3  | GN3                         | GT4                   | F   | 72  | 2004       | body        | moderate           | intestinal                         | metaplasia          | T3    | yes         | 5,28       | IIIA  |
| 4  | GN4                         | GT4                   | M   | 71  | 2005       | Distal      | moderate           | intestinal                         | metaplasia          | T3    | yes         | 0,24       | IIA   |
| 5  | GN5                         | GT5                   | M   | 54  | 2003       | Distal      | moderate to poorly | lymphoepithelioma-like, intestinal | adenoma, metaplasia | T2    | yes         | 0,11       | IB    |
| 6  | GN6                         | GT6                   | F   | 75  | 2003       | Proximal    | poorly             | intestinal                         | NA                  | T3    | yes         | 16,41      | IIC   |
| 7  | GN7                         | GT7                   | F   | 76  | 2003       | Antrum      | poorly             | NA                                 | NA                  | T4    | yes         | 6,25       | IIB   |
| 8  | GN8                         | GT8                   | F   | 68  | 2003       | Body        | poorly             | signet ring cell                   | NA                  | T4    | yes         | 13,16      | IIC   |
| 9  | GN9                         | GT9                   | M   | 69  | 2003       | Distal      | moderate           | intestinal                         | adenoma             | T3    | no          | 0,13       | IIA   |
| 10 | GN10                        | GT10                  | M   | 73  | 2003       | Proximal    | poorly             | muinous component                  | NA                  | T3    | yes         | 8,21       | IIB   |
| 11 | GN11                        | GT11                  | M   | 74  | 2004       | GE junction | moderate to poorly | NA                                 | NA                  | T4    | yes         | 5,9        | IIB   |
| 12 | GN12                        | GT12                  | M   | 53  | 2003       | Body        | moderate           | NA                                 | adenoma             | T1    | no          | 0,9        | IA    |
| 13 | GN13                        | GT13                  | F   | 74  | 2004       | Distal      | poorly             | signet ring cell                   | NA                  | T4    | yes         | 8,26       | IIC   |
| 14 | GN14                        | GT14                  | M   | 68  | 2004       | Body        | poorly             | signet ring cell                   | NA                  | T3    | yes         | 1,28       | IIB   |
| 15 | GN15                        | GT15                  | F   | 66  | 2004       | Body        | moderate           | intestinal                         | metaplasia          | T4    | yes         | 5,31       | IIB   |
| 16 | GN16                        | GT16                  | F   | 79  | 2004       | Body        | moderate to poorly | NA                                 | NA                  | T3    | yes         | 5,23       | IIIA  |
| 17 | GN17                        | GT17                  | M   | 74  | 2005       | Proximal    | poorly             | NA                                 | NA                  | T2    | yes         | 15,37      | IIIA  |
| 18 | GN18                        | GT18                  | M   | 68  | 2005       | Body        | moderate to poorly | muinous component                  | metaplasia          | T3    | yes         | 0,13       | IIA   |
| 19 | GN19                        | GT19                  | M   | 60  | 2003       | GE junction | moderate to poorly | signet ring cell                   | NA                  | T2    | yes         | 2,3        | IIB   |
| 20 | GN20                        | GT20                  | F   | 61  | 2006       | Body        | poorly             | signet ring cell                   | NA                  | T1    | no          | 0,12       | IA    |
| 21 | GN21                        | GT21                  | F   | 68  | 2007       | Body        | poorly             | signet ring cell                   | NA                  | T4    | yes         | 14,18      | IIC   |
| 22 | GN22                        | GT22                  | F   | 64  | 2007       | Body        | moderate to poorly | muinous component                  | NA                  | T3    | no          | 2,28       | IIB   |

**Table S2.** Characteristics of expression datasets of Asian Pacific patients reported in published studies including the Caucasian patients in this study.

| <b>Dataset</b>         | <b>Ethnic Group</b> | <b>Comparison Group</b>       | <b>Measurement Platform</b> | <b>Gene No.</b> |
|------------------------|---------------------|-------------------------------|-----------------------------|-----------------|
| <b>TCGA (22)</b>       | Caucasian           | 29 paired tumor and non-tumor | Illumina Hiseq              | 27,608          |
| <b>Cho et al. (21)</b> | Korean              | 65 tumor vs. 19 non-tumor     | Illumina Human WG-6 v3.0    | 25,235          |
| <b>Kim et al. (20)</b> | Korean              | 24 tumor vs. 6 non-tumor      | SOLiD Single-read RNA-seq   | 18,890          |
| <b>This study</b>      | Caucasian           | 22 paired tumor and non-tumor | SOLiD Paired-end RNA-seq    | 15,987          |

**Table S3.** Clinical and pathological characteristics of tumor cases in the tissue microarray.

| <b>Total cases</b>             | <b>251<br/>(Discovery set 2006)</b> | <b>251<br/>(Validation set 2005)</b> |
|--------------------------------|-------------------------------------|--------------------------------------|
| <b>Sex</b>                     |                                     |                                      |
| Male : Female                  | 2.73 : 1 (71%:29%)                  | 1.89 : 1 (65%:35%)                   |
| <b>Age</b>                     | 59 ± 12 yrs (26-82)                 | 58 ± 12 yrs (28-84)                  |
| <b>Lauren type</b>             |                                     |                                      |
| Intestinal                     | 42%                                 | 50.60%                               |
| Diffuse                        | 51.20%                              | 47.80%                               |
| Mixed                          | 6.40%                               | 1.20%                                |
| Indeterminate                  | 0.40%                               | 0.40%                                |
| <b>Depth</b>                   |                                     |                                      |
| pT2                            | 26.80%                              | 32.30%                               |
| pT3                            | 40.00%                              | 37.50%                               |
| pT4a                           | 29.20%                              | 28.30%                               |
| pT4b                           | 4.00%                               | 2%                                   |
| <b>Nodal involvement</b>       |                                     |                                      |
| pN0                            | 30.40%                              | 31.10%                               |
| pN1                            | 24.80%                              | 16.30%                               |
| pN2                            | 19.60%                              | 23.90%                               |
| pN3a                           | 16.40%                              | 17.10%                               |
| pN3b                           | 8.80%                               | 11.60%                               |
| <b>Lymphovascular invasion</b> |                                     |                                      |
| absent                         | 46.40%                              | 37.50%                               |
| present                        | 53.60%                              | 62.50%                               |
| <b>UICC stage</b>              |                                     |                                      |
| Ib                             | 15.20%                              | 16.70%                               |
| IIa                            | 18.00%                              | 16.30%                               |
| IIb                            | 18.80%                              | 19.50%                               |
| IIIa                           | 17.20%                              | 13.50%                               |
| IIIb                           | 14.00%                              | 16.30%                               |
| IIIc                           | 16.80%                              | 17.50%                               |
| <b>Recurrence</b>              |                                     |                                      |
| absent                         | 76.80%                              | 69.30%                               |
| present                        | 23.20%                              | 30.70%                               |
| <b>Death</b>                   |                                     |                                      |
| no                             | 75.20%                              | 64.50%                               |
| yes                            | 24.80%                              | 35.50%                               |

The total number of cases was 251 (discovery data set) and 251 (validation data set). Inclusion criteria: advanced gastric adenocarcinoma cases underwent gastrectomy and lymphadenectomy from Jan. 2006 to Dec. 2006 (discovery data set) and from Jan. 2005 to Dec. 2005 (validation data set) at the National Cancer Center, Korean.

Exclusion criteria: noncurative resection, developed in remnant stomach, follow-up was incomplete.

**Table S4.** Relationships of WNT5A intensity and positivity with pathological and clinical variables.

|                          | WNT5A Intensity<br>(Discovery data set 2006) |            |            | p-value | WNT5A Intensity<br>(Validation data set 205) |           |           | p-value |
|--------------------------|----------------------------------------------|------------|------------|---------|----------------------------------------------|-----------|-----------|---------|
|                          | 0                                            | 1          | 2          |         | 0                                            | 1         | 2         |         |
| <b>Sex</b>               |                                              |            |            |         |                                              |           |           |         |
| Male                     | 35 (62.5%)                                   | 98 (71.0%) | 45 (78.9%) | 0.157   | 22(59.5%)                                    | 95(65.1%) | 47(69.1%) | 0.607   |
| Female                   | 21 (37.5%)                                   | 40 (29.0%) | 12 (21.1%) |         | 15(40.5%)                                    | 51(34.9%) | 21(30.9%) |         |
| Total                    | 56                                           | 138        | 57         |         | 37                                           | 146       | 68        |         |
| <b>Age (mean±SD)</b>     | 57.0±12.1                                    | 57.7±12.6  | 63.5±8.4   | <0.001  | 55.7±10.7                                    | 57.6±13.0 | 60.9±11.7 | 0.078   |
| <b>Lauren</b>            |                                              |            |            |         |                                              |           |           |         |
| Intestinal               | 15 (26.8%)                                   | 57 (43.5%) | 34 (73.9%) | <0.001  | 9(24.3%)                                     | 70(49.0%) | 48(71.6%) | <0.001  |
| Diffuse                  | 41 (73.2%)                                   | 74 (56.5%) | 12 (26.1%) |         | 28(75.7%)                                    | 73(51.0%) | 19(28.4%) |         |
| <b>Depth</b>             |                                              |            |            |         |                                              |           |           |         |
| pT2                      | 16 (28.6%)                                   | 37 (26.8%) | 16 (28.1%) | 0.062   | 10(27.0%)                                    | 48(32.9%) | 23(33.8%) | 0.381   |
| pT3                      | 31 (55.4%)                                   | 47 (34.1%) | 22 (38.6%) |         | 13(35.1%)                                    | 52(35.6%) | 29(42.6%) |         |
| pT4a                     | 9 (16.1%)                                    | 47 (34.1%) | 16 (28.1%) |         | 14(37.8%)                                    | 46(31.5%) | 16(23.5%) |         |
| pT4b                     | 0 (0.0%)                                     | 7 (5.1%)   | 3 (5.3%)   |         | 0(0.0%)                                      | 5(3.4%)   | 0(0.0%)   |         |
| <b>Nodal involvement</b> |                                              |            |            |         |                                              |           |           |         |
| pN0                      | 23 (41.1%)                                   | 35 (25.4%) | 20 (35.1%) | 0.005   | 12(32.4%)                                    | 48(32.9%) | 18(26.5%) | 0.632   |
| pN1                      | 10 (17.9%)                                   | 39 (28.3%) | 13 (22.8%) |         | 6(16.2%)                                     | 20(13.7%) | 15(22.1%) |         |
| pN2                      | 12 (21.4%)                                   | 27 (19.6%) | 9 (15.8%)  |         | 6(16.2%)                                     | 34(23.3%) | 20(29.4%) |         |
| pN3a                     | 11 (19.6%)                                   | 26 (18.8%) | 4 (7.0%)   |         | 8(21.6%)                                     | 26(17.8%) | 9(13.2%)  |         |
| pN3b                     | 0 (0%)                                       | 11 (8.0%)  | 11 (19.3%) |         | 5(13.5%)                                     | 18(12.3%) | 6(8.8%)   |         |
| <b>UICC stage</b>        |                                              |            |            |         |                                              |           |           |         |
| IB                       | 11 (19.6%)                                   | 18 (13.0%) | 11 (19.3%) | 0.122   | 6(16.2%)                                     | 26(17.8%) | 10(14.7%) | 0.904   |
| IIA                      | 11 (19.6%)                                   | 22 (15.9%) | 12 (21.1%) |         | 5(13.5%)                                     | 23(15.8%) | 13(19.1%) |         |
| IIB                      | 11 (19.6%)                                   | 28 (20.3%) | 8 (14.0%)  |         | 8(21.6%)                                     | 27(18.5%) | 14(20.6%) |         |
| IIIA                     | 13 (23.2%)                                   | 26 (18.8%) | 4 (7.0%)   |         | 4(10.8%)                                     | 18(12.3%) | 12(17.6%) |         |
| IIIB                     | 6 (10.7%)                                    | 16 (11.6%) | 12 (21.1%) |         | 5(13.5%)                                     | 25(17.1%) | 11(16.2%) |         |
| IIIC                     | 4 (7.1%)                                     | 28 (20.3%) | 10 (17.5%) |         | 9(24.3%)                                     | 27(18.5%) | 8(11.8%)  |         |

**Table S5.** Clinical relevance of WNT5A in diffuse type. Beta is an estimate of logarithm of hazard ratio, so exp(beta) implies hazard ratio compared with baseline hazard rate. ( Df: degrees of freedom; Coxph: cox proportional hazard model)

| Test     | WNT5A intensity<br>(diffuse type case)  | Discovery data set<br>(2006) |                 |       |          | Validation data set<br>(2005) |                 |       |         | Merged:<br>Discovery and Validation data set<br>(2006 and 2005) |                 |       |          |          |
|----------|-----------------------------------------|------------------------------|-----------------|-------|----------|-------------------------------|-----------------|-------|---------|-----------------------------------------------------------------|-----------------|-------|----------|----------|
|          |                                         | Beta<br>(exp(beta))          | se              | z     | P-value  | Beta<br>(exp(beta))           | se              | z     | P-value | Beta<br>(exp(beta))                                             | se              | z     | P-value  |          |
| Log-rank | 0 vs. (1 and 2)<br>df1                  |                              |                 |       | 2.51E-02 |                               |                 |       | 0.115   |                                                                 |                 |       | 5.70E-03 |          |
|          | 0 vs. 1 vs. 2<br>df2                    |                              |                 |       | 7.79E-05 |                               |                 |       | 0.269   |                                                                 |                 |       | 5.10E-03 |          |
| Coxph    | No covariates<br>0 vs. (1 and 2)<br>df1 | 0.967<br>(2.63)              | 0.449           | 2.16  | 3.10E-02 | 0.637<br>(1.89)               | 0.411           | 1.55  | 0.120   | 0.814<br>(2.26)                                                 | 0.303           | 2.69  | 7.20E-03 |          |
|          | Sex, age<br>0 vs. (1 and 2)<br>df1      | 0.962<br>(2.62)              | 0.451           | 2.14  | 3.30E-02 | 0.608<br>(1.84)               | 0.413           | 1.48  | 0.140   | 0.751<br>(2.12)                                                 | 0.305           | 2.46  | 1.40E-02 |          |
|          | No covariates<br>0 vs. 1 vs. 2<br>df2   | 0 vs. 1                      | 0.747<br>(2.11) | 0.463 | 1.61     | 1.10E-01                      | 0.666<br>(1.95) | 0.419 | 1.59    | 0.110                                                           | 0.729<br>(2.07) | 0.310 | 2.35     | 1.90E-02 |
|          |                                         | 0 vs. 2                      | 2.041<br>(7.70) | 0.543 | 3.76     | 1.70E-04                      | 0.517<br>(1.68) | 0.535 | 0.97    | 0.330                                                           | 1.184<br>(3.27) | 0.379 | 3.12     | 1.80E-03 |
|          |                                         | 0 vs. 1 vs. 2                |                 |       |          | 1.27E-03                      |                 |       |         | 0.236                                                           |                 |       |          | 4.57E-03 |
|          | Sex, age<br>0 vs. 1 vs. 2<br>df2        | 0 vs. 1                      | 0.760<br>(2.22) | 0.465 | 1.63     | 1.00E-01                      | 0.636<br>(1.89) | 0.420 | 1.51    | 0.130                                                           | 0.720<br>(2.05) | 0.310 | 2.32     | 2.00E-02 |
|          |                                         | 0 vs. 2                      | 1.778<br>(5.92) | 0.550 | 3.23     | 1.20E-03                      | 0.495<br>(1.64) | 0.535 | 0.92    | 0.360                                                           | 1.102<br>(3.01) | 0.381 | 2.89     | 3.80E-03 |
|          |                                         | 0 vs. 1 vs. 2                |                 |       |          | 5.93E-03                      |                 |       |         | 0.274                                                           |                 |       |          | 8.15E-03 |

**Fig. S1A**

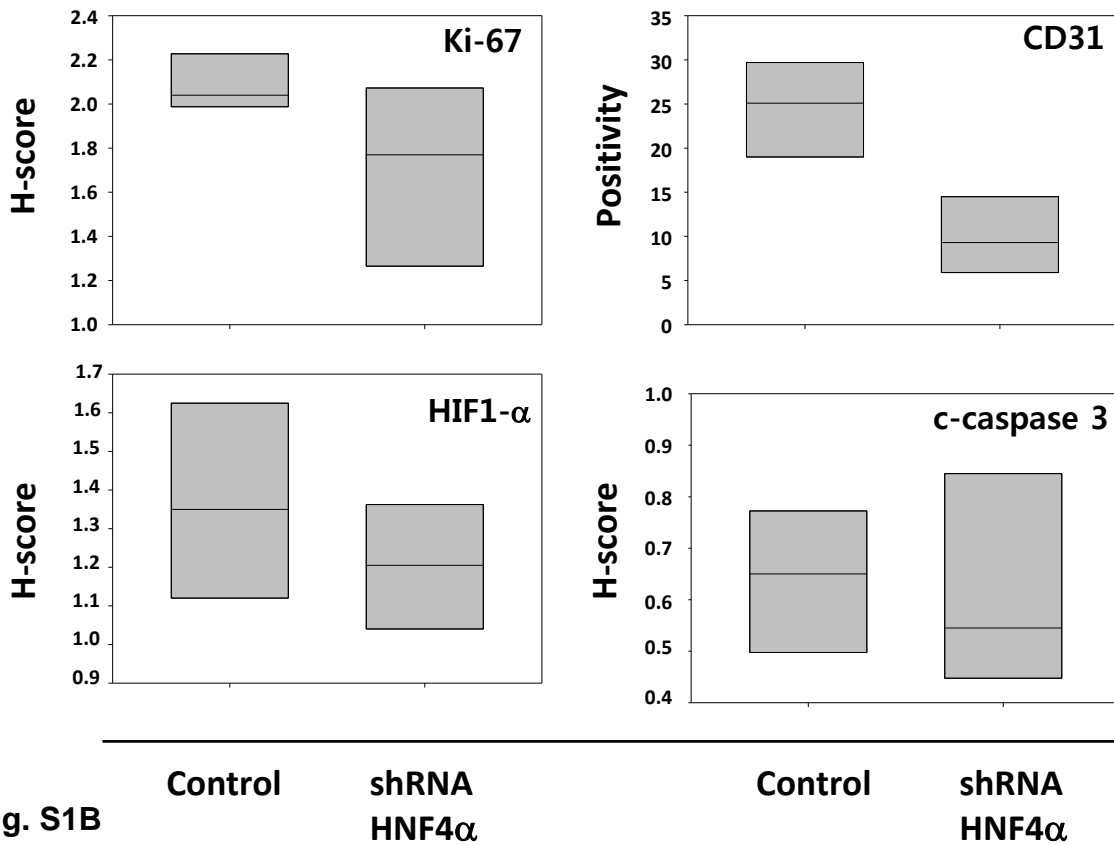

**Fig. S1B**

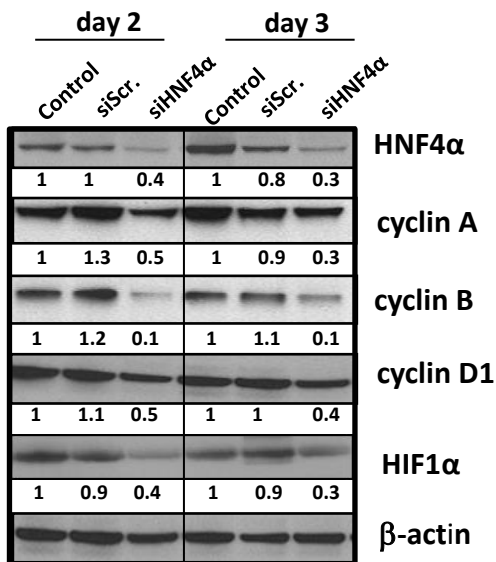

**Fig. S1.** HNF4α inhibition shows antiproliferative activity. (A) IHC analysis on xenograft tumor samples silenced with shRNA-mediated HNF4α showing inhibited growth, angiogenesis and HIF-1α, in the NCI-N87 cell line. (B) Immunoblotting analysis on NCI-N87 cell line knockdown with siRNA mediated HNF4α showed decreased cell cycle regulators and HIF-1α.

Fig. S2A

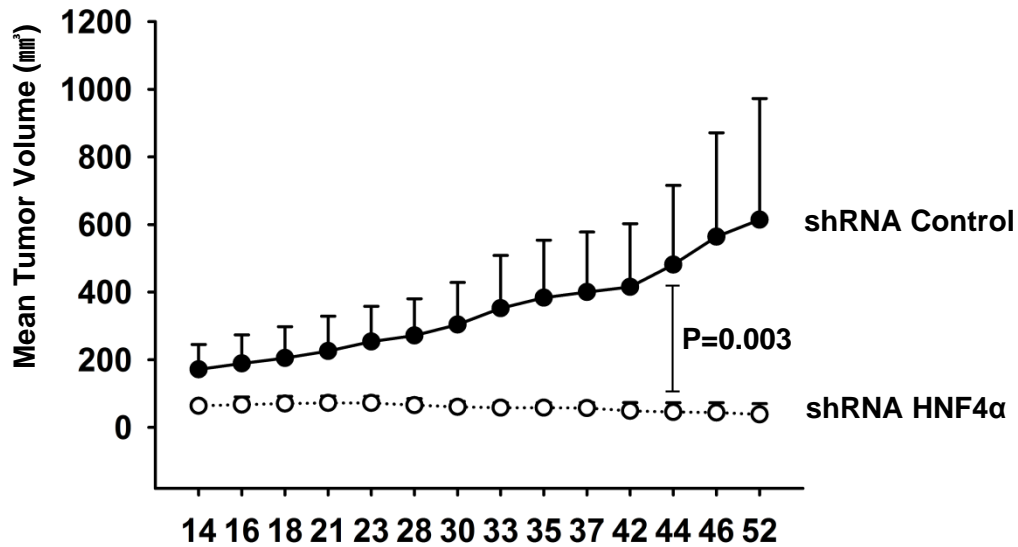

Fig. S2B

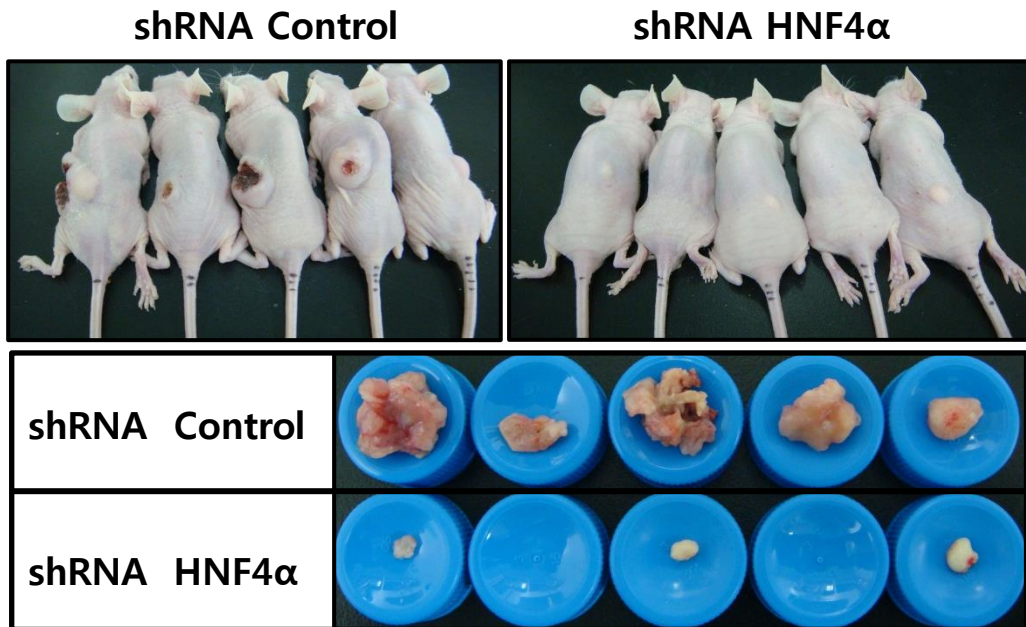

**Fig. S2.** HNF4 $\alpha$  inhibition shows anti-tumor activity. (A) and (B) shRNA lentiviral particles targeting different regions of HNF4 $\alpha$  mRNA or shRNA empty vectors were infected into MKN45 cells. Stably transfected cells were selected by puromycin. Ten, 5-week-old female BALB/C nude mice were randomly divided into two groups (5 for shRNA control, and 5 for shRNA HNF4 $\alpha$ ). Approximately  $10^7$  shRNA control (CTRL) cells and shRNA HNF4 $\alpha$  cells in 100 $\mu$ L phosphate-buffered saline were inoculated subcutaneously.

Fig. S3A

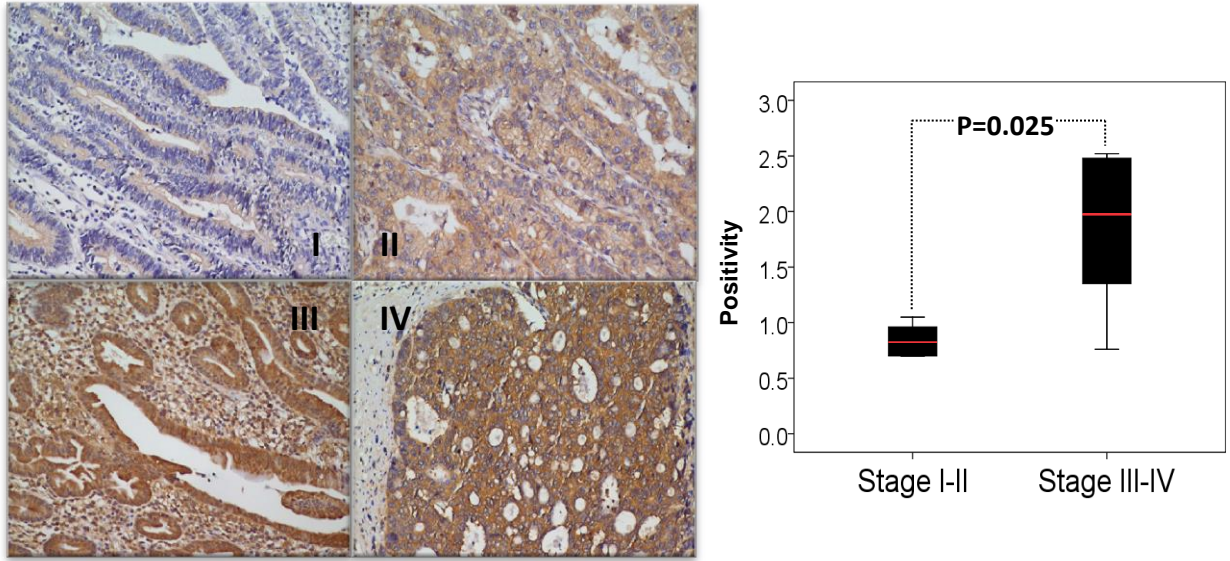

Fig. S3B

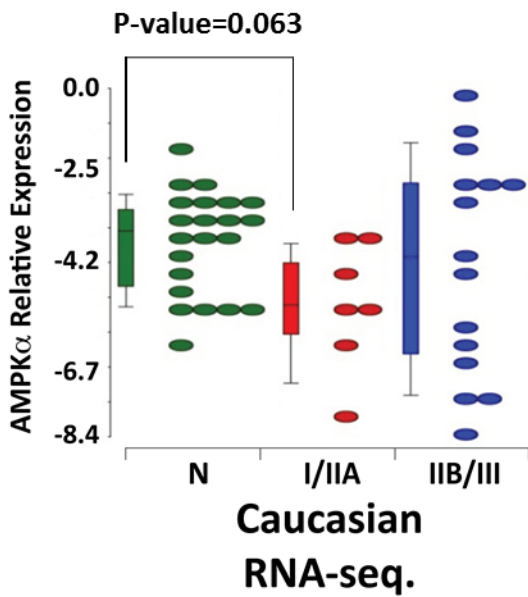

Fig. S3C

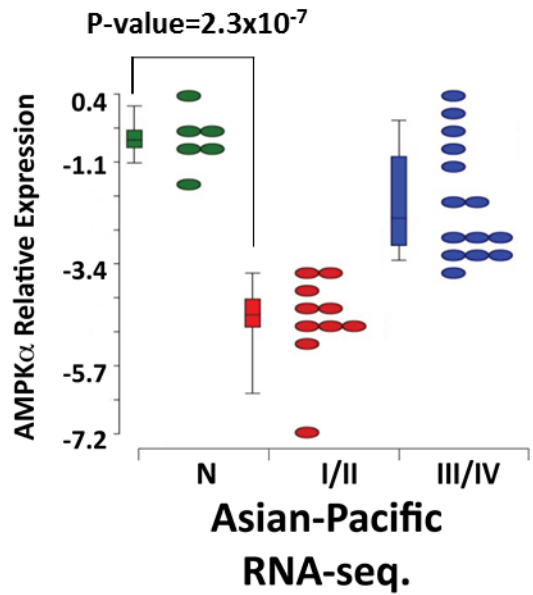

**Fig. S3.** Expression of AMPK $\alpha$ 2 in both Caucasian and Pacific-Asian GC patients tumors. **(A)** AMPK $\alpha$ 2 expression on Asian gastric cancer, and immunohistochemistry was done on 10 patient tissue samples per tumor stage. **(B)-(C)** The expression of AMPK $\alpha$ 2 based on RNA-seq data.



**Fig. S4A**

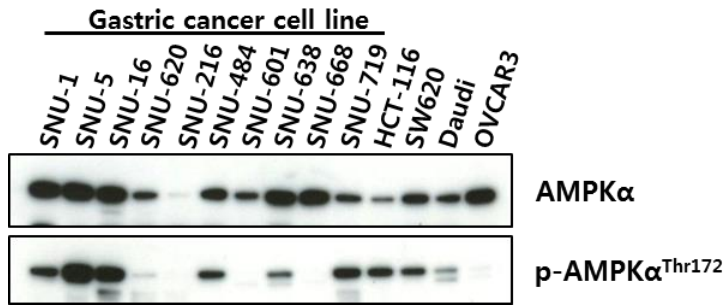

**Fig. S4B**

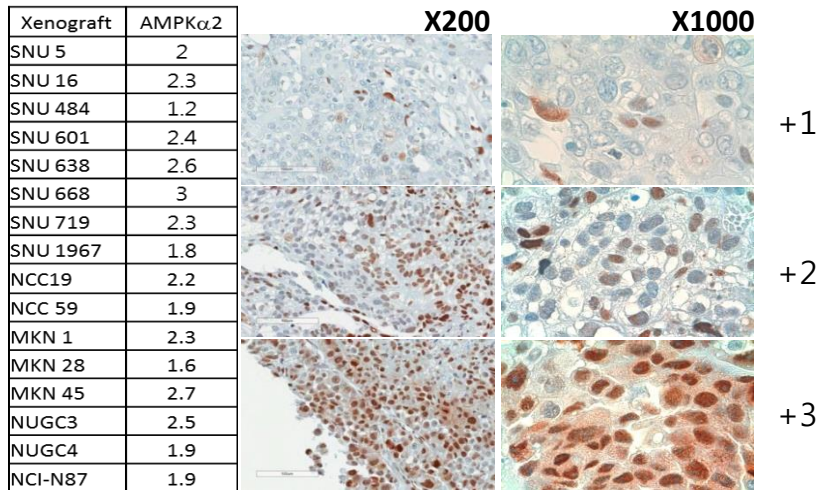

**Fig. S4C**

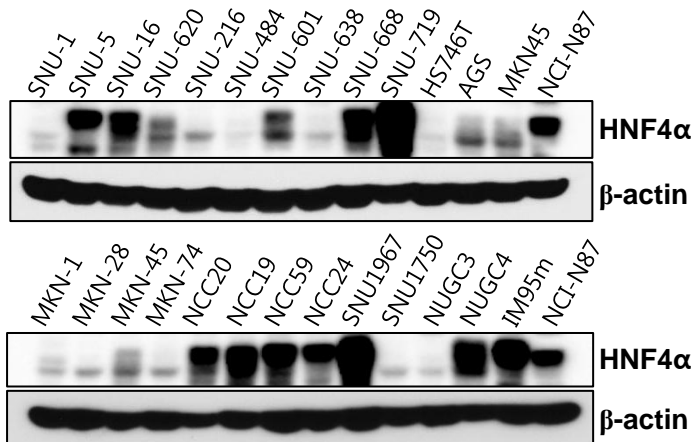

**Fig. S4.** The protein expression of AMPK $\alpha$ . **(A)** in a panel of gastric cell lines and **(B)** xenograft models from various GC cell lines **(C)** Protein expression of HNF4 $\alpha$  in a panel of gastric cell lines.

Fig. S5

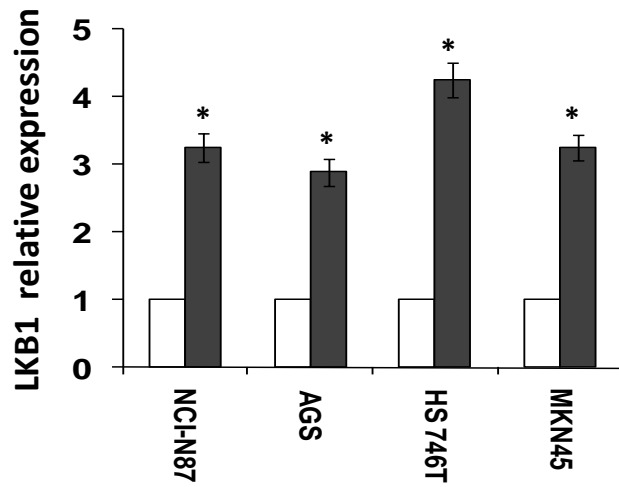

**Fig S5.** Effect of metformin treatment on the expression of liver kinase B1 (LKB1). Measurement of LKB1 gene expression levels at day 2 with metformin treatment. (white bars= NT, black bar= MET (10 mM) treatment. RNA expression was determined using qRT-PCR, \* $P < 0.05$ ).

**Fig. S6**

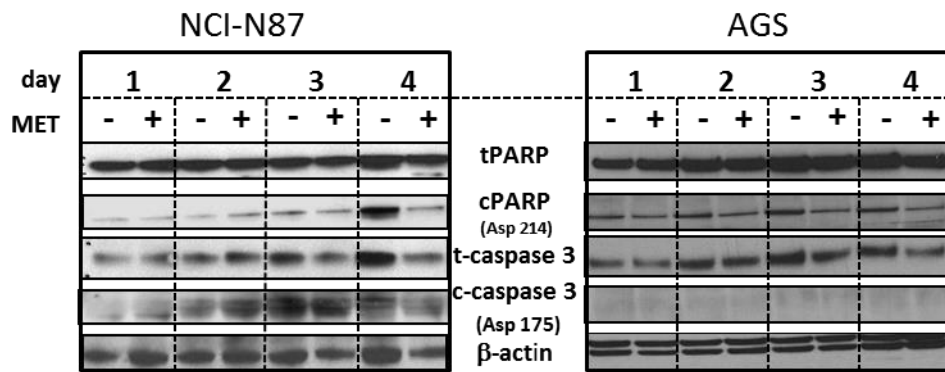

**Fig. S6.** Metformin antiproliferation activity against NCI-N87 and AGS GC cells. Decreased levels of cleaved caspase 3 and poly ADP-ribose polymerase upon metformin treatments, as determined by immunoblotting.

**Fig. S7**

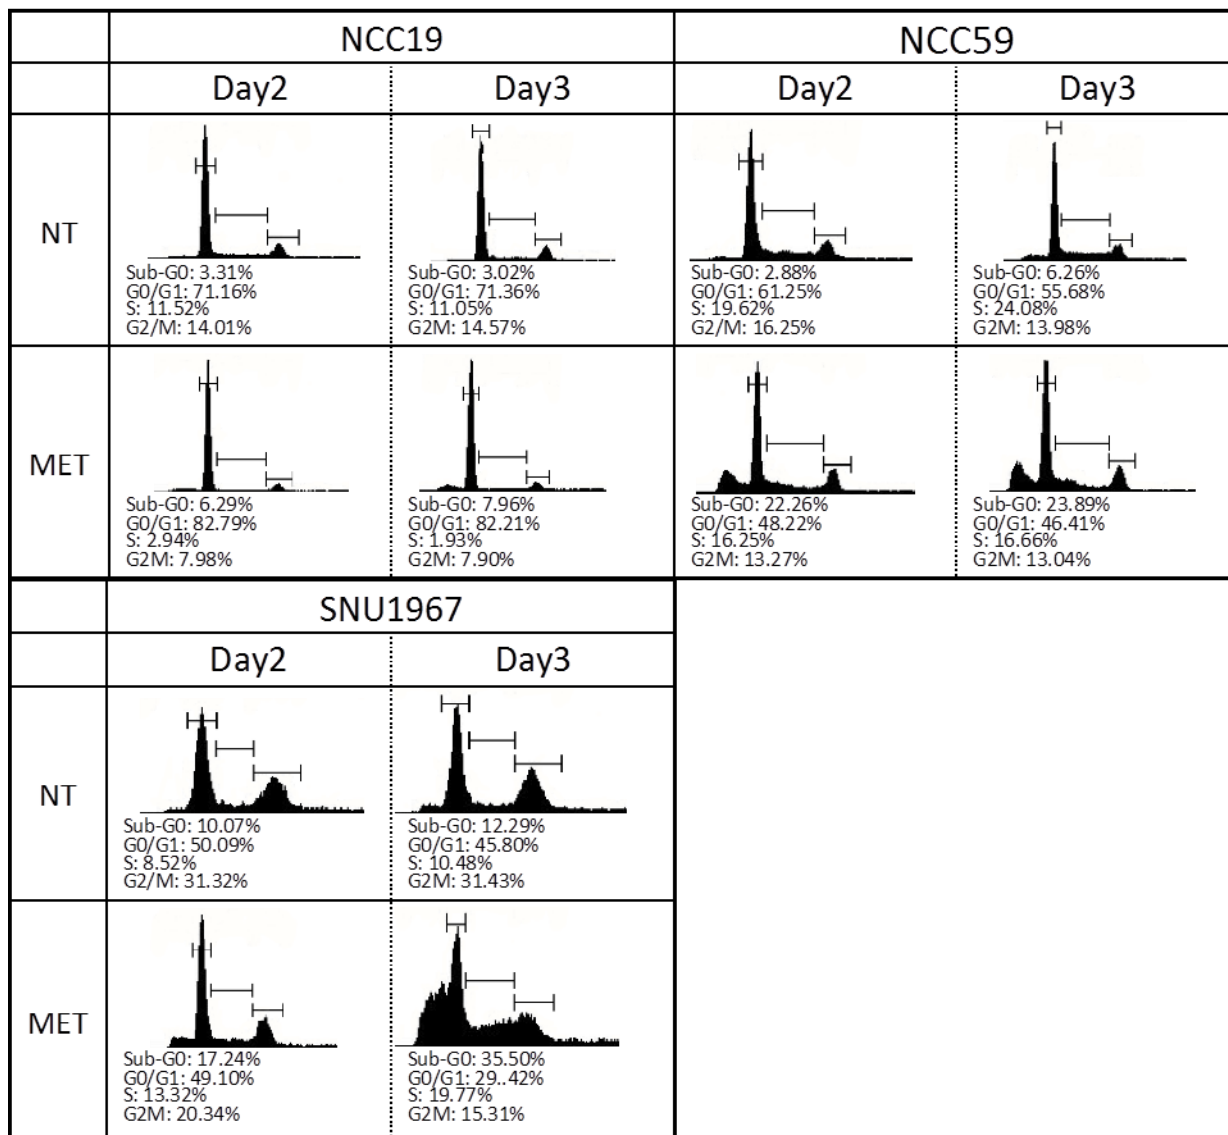

**Fig S7** Cell cycle effects following metformin treatment. Measurement of cell cycle distribution at days 2 and 3 after metformin treatment.

Fig. S8

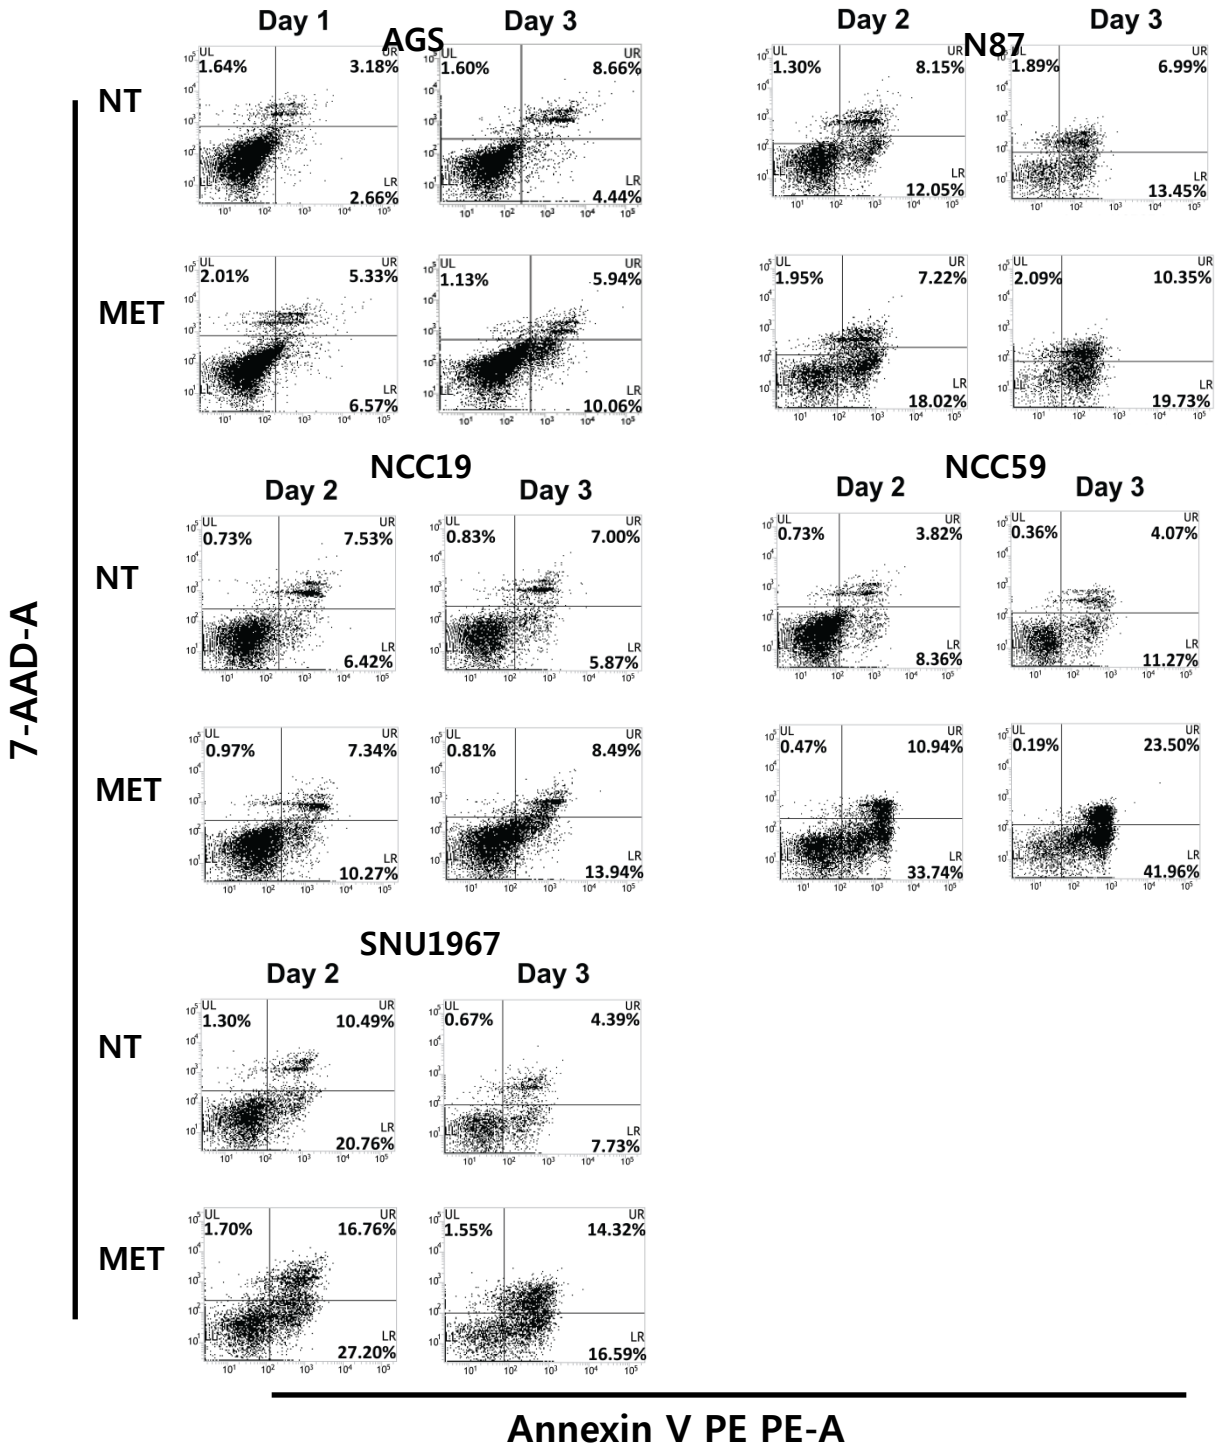

Fig. S8. Apoptotic activity of metformin treatment of five GC cell lines. Apoptosis and necrosis were analyzed by flow cytometry. Annexin V PE apoptosis detection Kit I (BD Biosciences) was used for staining the cells.

**Fig. S9**

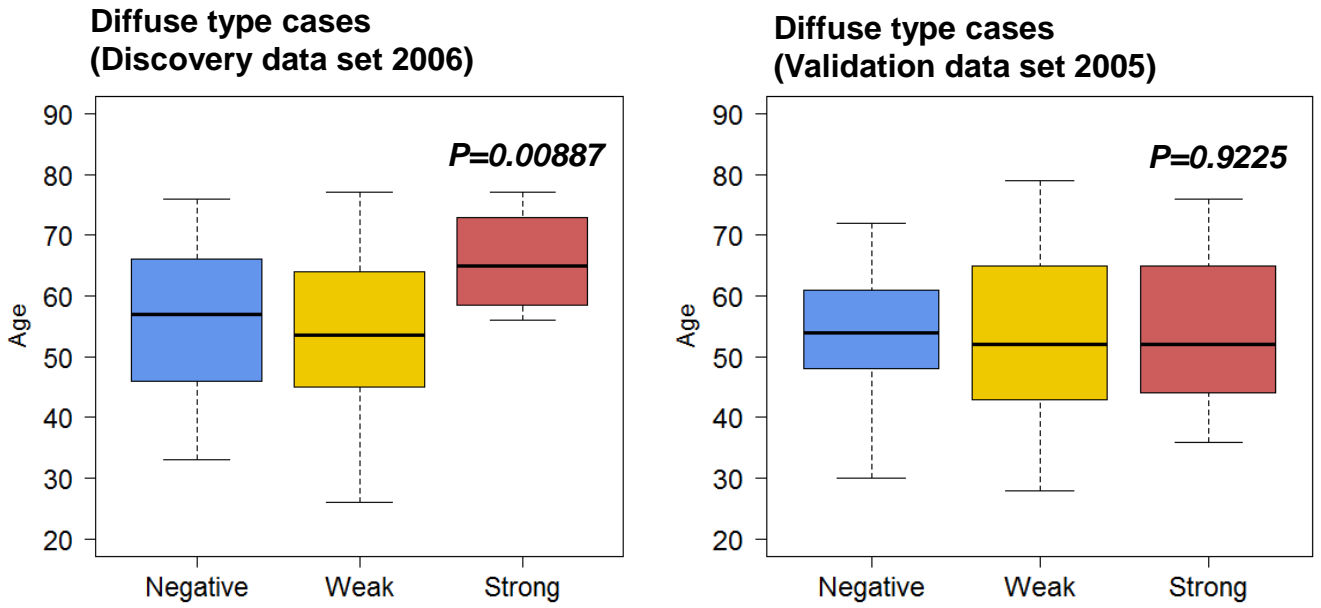

**Fig. S9** Clinical relevance of WNT5A expression in diffuse type GC. Significance in aging population (left panel) in discovery data set-2006 vs. validation data set-2005 (right panel) .

**Fig. S10A**

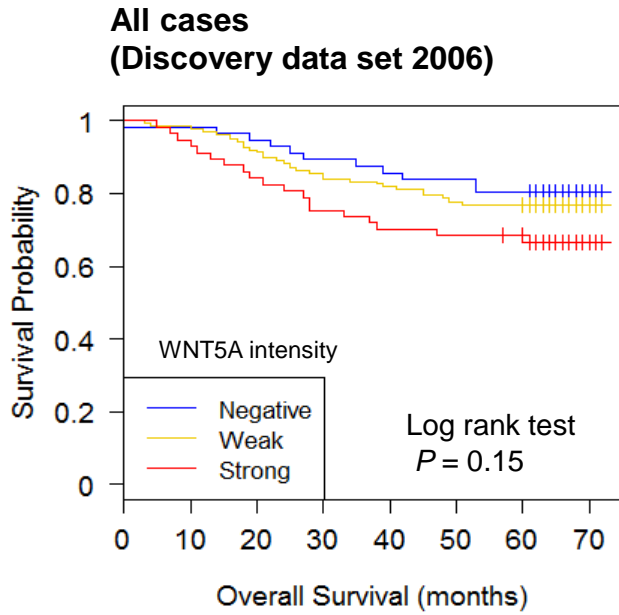

**Fig. S10B**

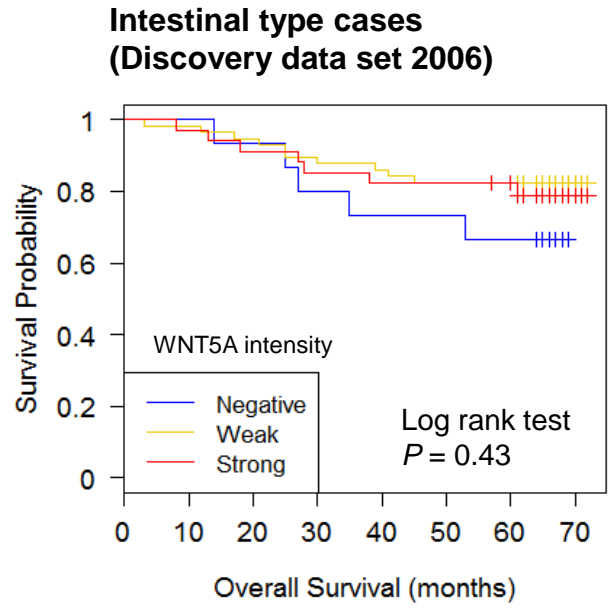

**Fig. S10C**

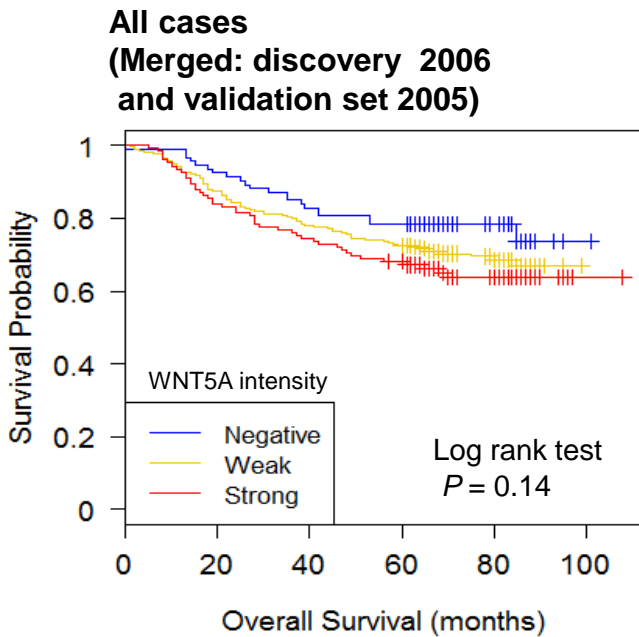

**Fig. S10D**

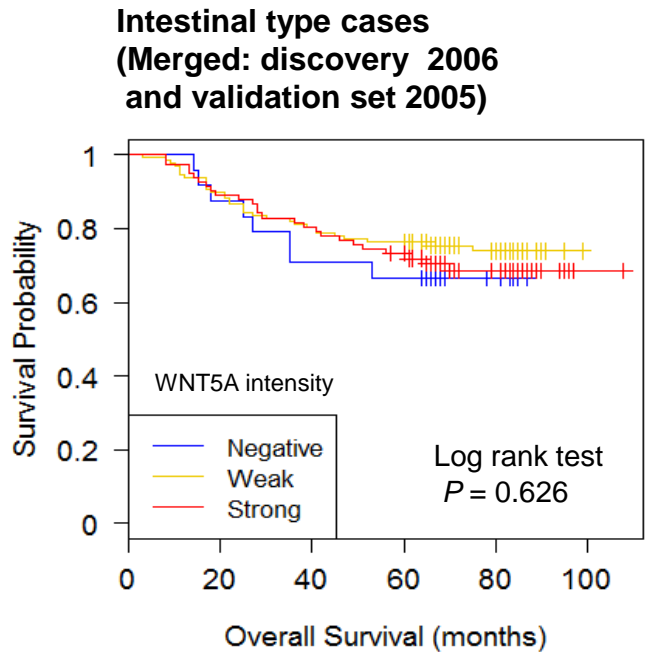

**Fig. S10** Discovery data set-2006 and merged (discovery 2006 and validation data set-2005). Kaplan-Meier plots showing the correlation of WNT5A with overall patient survival (A) in all cases and (B) in intestinal type cases. (C) WNT5A expression as associated with overall survival in all GC subtypes (C) or in intestinal type GC (D) cases.

**Fig. S11A**

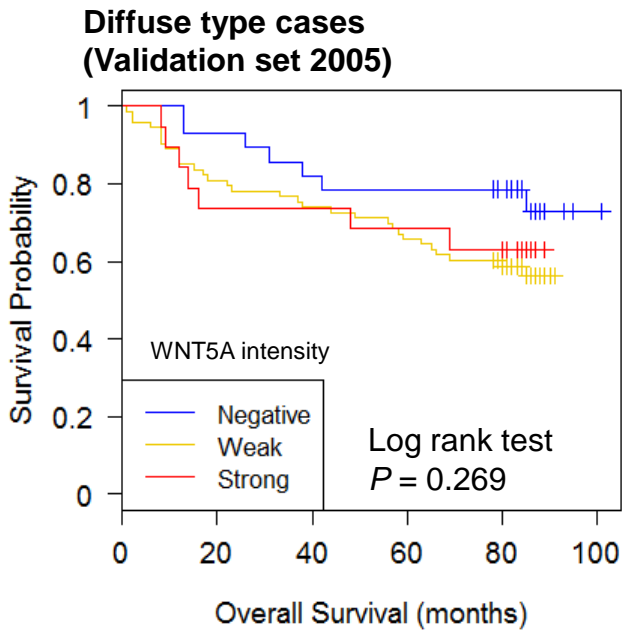

**Fig. S11B**

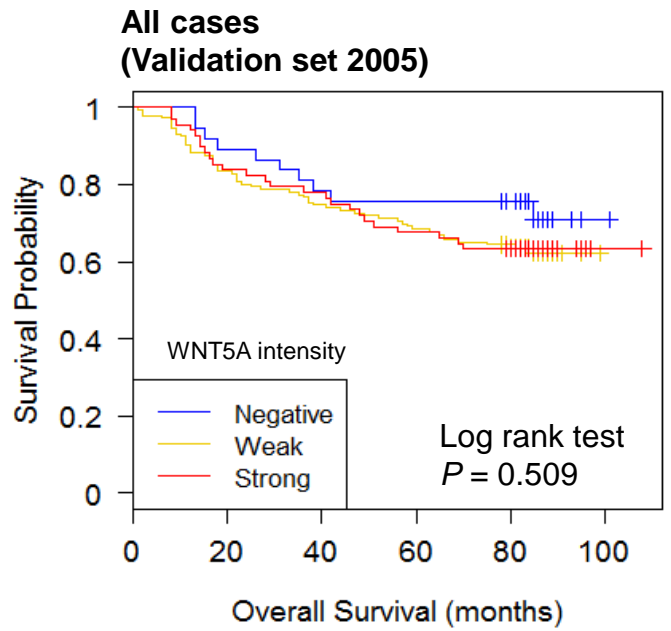

**Fig. S11C**

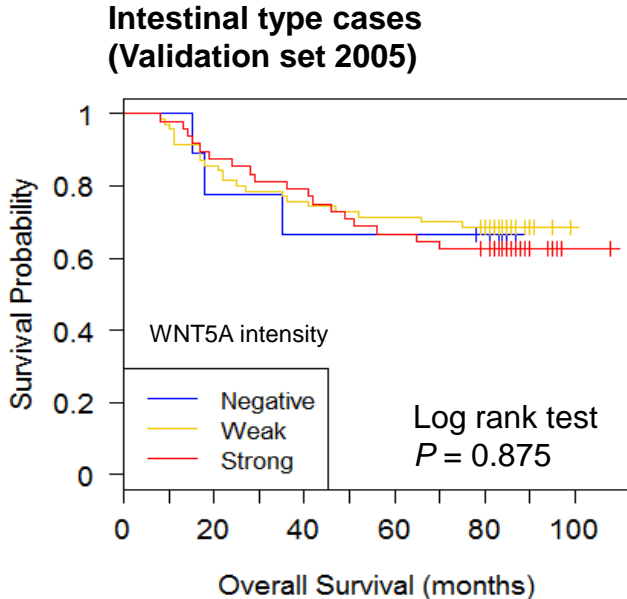

**Fig. S11** Validation data set 2005, Kaplan-Meier plots showing the correlation of WNT5A with patient Survivals (A) in all cases and (B) in intestinal type cases.
